# Supplementary material for: CoMetGeNe: mining conserved neighborhood patterns in metabolic and genomic contexts
Source: Springer Nature journal article supplement (doi:10.1186/s12859-018-2542-2), 2019-01-10
Supplement: 12859_2018_2542_MOESM1_ESM.pdf [file 12859_2018_2542_MOESM1_ESM.pdf]

# CoMetGeNe: mining conserved neighborhood patterns in metabolic and genomic contexts

Alexandra Zaharia, Bernard Labedan, Christine Froidevaux, Alain Denise

## NP-hardness proof sketch

LONGEST SUPPORTED PATH (LSP)

**Input:** A directed graph  $D = (V, A)$ , an undirected graph  $G = (V, E)$ .

**Solution:** A longest path  $P$  in  $D$  such that  $G[V(P)]$  is connected.

It is known that LSP is NP-hard for general graphs  $D$  and  $G$ ; It remains NP-hard even if  $D$  is acyclic and  $G$  is a tree with diameter 4 [1, 2].

MAXIMUM SPAN SUPPORTED TRAIL (MaSST)

**Input:** A directed graph  $D = (V, A)$ , an undirected graph  $G = (V, E)$ , an arc  $(u, v)$  in  $D$ .

**Solution:** A trail of maximum span  $T$  in  $D$  passing through  $(u, v)$  such that  $G[V(T)]$  is connected.

MAXIMUM SPAN SUPPORTED CORRESPONDING TRAIL (MaSSCoT)

**Input:** A directed graph  $D = (V, A)$ , an undirected graph  $G = (V, E)$ , an arc  $(u, v)$  in  $D$ .

**Solution:** A path  $P$  in the line graph of  $D$  such that  $L^{-1}(P)$  has maximum span, passes through  $(u, v)$ , and  $G[V(L^{-1}(P))]$  is connected.

Let us now state MAXIMUM SPAN TRAIL (MaST), a problem formulation closely related to MaSST:

MAXIMUM SPAN TRAIL (MaST)

**Input:** A directed graph  $D = (V, A)$ , an undirected graph  $G = (V, E)$ .

**Solution:** A trail of maximum span  $T$  in  $D$  such that  $G[V(T)]$  is connected.

**Proposition 1** MaST is NP-hard.

*Proof.* We know that LSP is NP-hard even if  $D$  is acyclic. Now, if  $D$  is acyclic, then LSP and MaST have exactly the same solution. Thus MaST is NP-hard (even if  $D$  is acyclic).  $\square$

**Proposition 2 (Corollary of proposition 1)** MaSST is NP-hard.

*Proof.* Suppose that MaSST is polynomially tractable. Then, by applying it on all arcs of  $D$  in turn, MaST can be solved in polynomial time as well. But MaST is NP-hard (proposition 1).  $\square$

**Lemma 1** Let  $D = (V, A)$  be a directed graph and  $L(D) = (A, A')$  be its line graph. Let  $P = (a_1, a_2, \dots, a_k)$  be a path in  $L(D)$ , where  $a_i = (t_{i-1}, t_i) \forall i \in \{1, \dots, k\}$  are edges in  $D$ . Then the unique sequence of vertices  $(t_0, t_1, t_2, \dots, t_{k-1}, t_k)$  associated to  $P$  is a trail in  $D$ .

*Proof.* By construction of  $P$  we have that the sequence of vertices  $T = (t_0, t_1, t_2, \dots, t_{k-1}, t_k)$  is unique and is a walk in  $D$ . Since  $P$  has no repeated vertices,  $T$  contains no repeated arcs.  $T$  is therefore a trail in  $D$ .  $\square$

**Proposition 3 (Corollary of proposition 2)** MaSSCoT is NP-hard.

*Proof.* A path in the line graph of a directed graph  $D$  is a trail in  $D$  (lemma 1). Let  $T = L^{-1}(P)$  be the trail in  $D$  corresponding to  $P$ . The solution to MaSSCoT is then a trail of maximum span  $T$  in  $D$  passing through  $(u, v)$  such that  $G[V(T)]$  is connected. MaSST and MaSSCoT are therefore equivalent and NP-hard (proposition 2).  $\square$

## References

- [1] Fertin G, Komusiewicz C, Mohamed-Babou H, Rusu I. Finding supported paths in heterogeneous networks. *Algorithms*. 2015;8(4):810–831.
- [2] Fertin G, Mohamed-Babou H, Rusu I. Algorithms for subnetwork mining in heterogeneous networks. In: *International Symposium on Experimental Algorithms*. Springer; 2012. p. 184–194.
