# Supplementary material for: CoMetGeNe: mining conserved neighborhood patterns in metabolic and genomic contexts
Source: Springer Nature journal article supplement (doi:10.1186/s12859-018-2542-2), 2019-01-10
Supplement: 12859_2018_2542_MOESM2_ESM.pdf [file 12859_2018_2542_MOESM2_ESM.pdf]

# CoMetGeNe: mining conserved neighborhood patterns in metabolic and genomic contexts

Alexandra Zaharia, Bernard Labedan, Christine Froidevaux, Alain Denise

## Reduction of $D$ and $G$ to the cover set of an arc of $D$

In this document we prove that reducing the input graphs  $D$  and  $G$  (for MaSST and MaSSCoT) to their cover set with respect to a path  $P$  in  $D$  yields the same solution as for the versions without reduction.

Assuming  $D$  is a directed graph, the following notations will be used:

- $D^*$  is the underlying undirected graph of  $D$  obtained by removing arc orientations.
- If  $G$  is an undirected graph such that  $V(D) = V(G)$  and  $P$  is a path in  $D$ , the notation  $CCC(D^*, G, P)$  designates the common connected component of  $D^*$  and  $G$  containing all vertices in  $P$ , if such a component exists. If it does not, then  $CCC(D^*, G, P) = \emptyset$ .
- For a vertex  $v$  of  $D$ ,  $S_v^+$  designates the descendants of  $v$ , i.e. the set of vertices in  $D$  that are reachable by a path from vertex  $v$ .
- For a vertex  $v$  of  $D$ ,  $S_v^-$  designates the ancestors of  $v$ , i.e. the set of vertices in  $D$  reaching vertex  $v$  by a path in  $D$ .

The definition of cover set of a path uses the concept of bridge, defined as follows by Fertin *et al.* [1]:

**Definition 1** Let  $D = (V, A)$  be a directed graph,  $G = (V, E)$  an undirected graph, and  $P$  a path in  $D$ . A vertex  $r \in V$  is said to be a *bridge of  $P$  with respect to  $G$*  if there is no common connected component of  $D^*[V - \{r\}]$  and  $G[V - \{r\}]$  containing all the vertices of  $P$  (i.e.,  $CCC(D^*[V - \{r\}], G[V - \{r\}], P) = \emptyset$ ).

Fertin *et al.* [1] define the cover set of a path as follows:

**Definition 2** Let  $D = (V, A)$  be a directed graph,  $G = (V, E)$  an undirected graph, and  $P = (v_1, v_2, \dots, v_k)$  a path in  $D$ . The *cover set of path  $P$  in  $D$  with respect to  $G$*  is the set  $X$  satisfying:

1.  $V(P) \subseteq X \subseteq S_{v_1}^- \cup S_{v_k}^+ \cup V(P)$ .
2.  $D^*[X]$  and  $G[X]$  are connected.
3. If  $r$  is a bridge of  $P$  in  $D[X]$  with respect to  $G[X]$  then  $X \subseteq S_r^- \cup S_r^+ \cup \{r\}$ .
4.  $X$  is maximal (with respect to the inclusion order).

Both MaSST and MaSSCoT take as input a directed graph  $D = (V, A)$ , an undirected graph  $G = (V, E)$ , and an arc  $(u, v)$  in  $D$ . Let  $S$  be the cover set of arc  $(u, v)$  in  $D$  with respect to  $G$ . We prove that  $D$  and  $G$  can respectively be replaced with  $D[S]$  and  $G[S]$ , yielding the same solutions.

Following is a lemma for which the proof is omitted because it is trivial.

**Lemma 1** Let  $G = (V, E)$  be an undirected graph and let  $A, B$  and  $C$  be three subsets of  $V$ . If  $G[A \cup B]$  and  $G[B \cup C]$  are connected, then  $G[A \cup B \cup C]$  is connected.

Next, we introduce a definition that will serve as a shorthand notation for the remainder of this document.

**Definition 3** Let  $D = (V, A)$  be a directed graph,  $G = (V, E)$  be an undirected graph and  $P$  be a path in  $D$ . If a trail  $T$  in  $D$  exists such that (i)  $T \supseteq P$ , (ii)  $G[V(T)]$  is connected and (iii)  $\nexists T'$  trail in  $D$  such that  $T' \supseteq P$ ,  $G[V(T')]$  is connected and  $\text{span}(T') > \text{span}(T)$ , then  $T$  is said to be a *trail of maximum span in  $D$  for  $P$  and  $G$  with respect to (i) and (ii)*, and  $T$  is said to *verify  $\mathcal{S}_P(D, G)$* .

**Lemma 2** Let  $D = (V, A)$  be a directed graph,  $G = (V, E)$  an undirected graph,  $P$  a path in  $D$ , and  $S$  the cover set of  $P$  in graphs  $D$  and  $G$ . If a trail  $T$  in  $D$  exists such that  $T$  verifies  $\mathcal{S}_P(D, G)$ , then  $V(T) \subseteq S$ .

*Proof.*  $T \supseteq P$  by hypothesis (i) of definition 3 and  $S \supseteq V(P)$  by definition of the cover set. It follows that  $V(T) \cap S \neq \emptyset$ . Let  $I = V(T) \cap S$  be the vertices shared by  $T$  and  $S$ . Let  $\{t_1, \dots, t_k\} = V(T) - I$  be the vertices of  $T$  not shared with  $S$ .

$G[V(T)]$  is connected by hypothesis (ii) of definition 3, therefore  $G[\{t_1, \dots, t_k\} \cup I]$  is connected. Since  $G[S]$  is connected (by definition of the cover set), it means that  $G[\{t_1, \dots, t_k\} \cup S] = G[\{t_1, \dots, t_k\} \cup I \cup (S - I)]$  is also connected (by lemma 1). Also,  $D^*[V(T)]$  is connected because  $T$  is a trail in  $D$ , which means that  $D^*[\{t_1, \dots, t_k\} \cup I]$  is connected. Since  $D^*[S]$  is connected (by definition of the cover set), it means that  $D^*[\{t_1, \dots, t_k\} \cup S] = D^*[\{t_1, \dots, t_k\} \cup I \cup (S - I)]$  is also connected (by lemma 1).

But if  $G[\{t_1, \dots, t_k\} \cup S]$  and  $D^*[\{t_1, \dots, t_k\} \cup S]$  are connected, then property 4 of definition 2 is contradicted, therefore  $S$  cannot be maximal unless  $\{t_1, \dots, t_k\} = \emptyset$ . Hence  $V(T) \subseteq S$ .  $\square$

**Proposition 1** Let  $D = (V, A)$  be a directed graph,  $G = (V, E)$  an undirected graph,  $P$  a path in  $D$ , and  $S$  the cover set of  $P$  in graphs  $D$  and  $G$ . If a trail  $T$  in  $D$  exists such that  $T$  verifies  $\mathcal{S}_P(D, G)$ , then  $T$  is also a trail in  $D[S]$  verifying  $\mathcal{S}_P(D[S], G[S])$ , that is, (i)  $T \supseteq P$ , (ii)  $G[S \cap V(T)]$  is connected and (iii)  $T$  has maximum span in  $D[S]$  with respect to (i) and (ii).

*Proof.* Let  $T$  be a trail in  $D$  such that  $T$  verifies  $\mathcal{S}_P(D, G)$ . By lemma 2,  $V(T) \subseteq S$ , therefore  $T$  is also a trail in  $D[S]$ . We will now prove that  $T$  verifies properties (i)-(iii) for graphs  $D[S]$  and  $G[S]$ .

- (i) By hypothesis (i) of definition 3,  $T \supseteq P$ .
- (ii) Since  $V(T) \subseteq S$ ,  $G[S \cap V(T)] = G[V(T)]$ . Since  $G[V(T)]$  is connected by hypothesis (ii) of definition 3, it follows that  $G[S \cap V(T)]$  is connected.
- (iii) Suppose there exists a trail  $T'$  in  $D[S]$  verifying  $\mathcal{S}_P(D[S], G[S])$ , that is,  $T' \supseteq P$ ,  $G[S \cap V(T')]$  is connected and  $\text{span}(T') > \text{span}(T)$ . Because  $T'$  is a trail in  $D[S]$ ,  $V(T') \subseteq S$ , which implies that  $S \cap V(T') = V(T')$ . Since  $G[S \cap V(T')]$  is connected, it follows that  $G[V(T')]$  is also connected. Moreover,  $S \subseteq V$  by definition 2, therefore  $T'$  is also a trail in  $D$ . Hypotheses (i)-(iii) of definition 3 are thus fulfilled for  $T'$  in  $D$ , meaning that  $T'$  verifies  $\mathcal{S}_P(D, G)$ , which contradicts the fact that  $T$  verifies  $\mathcal{S}_P(D, G)$ . Hence, no trail  $T'$  can exist in  $D[S]$  that includes  $P$  such that  $G[S \cap V(T')]$  is connected and such that  $T'$  has greater span than  $T$ .  $T$  has therefore maximum span in  $D[S]$  with respect to properties (i) and (ii).

We have proved that, if a trail  $T$  in  $D$  exists such that  $T$  verifies  $\mathcal{S}_P(D, G)$ , then  $T$  is also a trail in  $D[S]$  that verifies  $\mathcal{S}_P(D[S], G[S])$ .  $\square$

**Proposition 2** Let  $D = (V, A)$  be a directed graph,  $G = (V, E)$  an undirected graph,  $P$  a path in  $D$ , and  $S$  the cover set of  $P$  in graphs  $D$  and  $G$ . If a trail  $T$  in  $D[S]$  exists that verifies  $\mathcal{S}_P(D[S], G[S])$ , then  $T$  is also a trail in  $D$  verifying  $\mathcal{S}_P(D, G)$ , that is, (i)  $T \supseteq P$ , (ii)  $G[V(T)]$  is connected and (iii)  $T$  has maximum span in  $D$  with respect to (i) and (ii).

*Proof.* This proposition is the converse of proposition 1. Let  $T$  be a trail in  $D[S]$  such that  $T$  verifies  $\mathcal{S}_P(D[S], G[S])$ . By definition 2,  $S \subseteq V$ , therefore  $T$  is also a trail in  $D$ . We will now prove that  $T$  verifies properties (i)-(iii) for graphs  $D$  and  $G$ .

- (i) By hypothesis (i) of definition 3,  $T \supseteq P$ .
- (ii) Since  $T$  is a trail in  $D[S]$ ,  $V(T) \subseteq S$ . Then  $S \cap V(T) = V(T)$ , and since  $G[S \cap V(T)]$  is connected by hypothesis (ii) of definition 3, it follows that  $G[V(T)]$  is connected.
- (iii) Suppose there exists a trail  $T'$  in  $D$  verifying  $\mathcal{S}_P(D, G)$ , that is,  $T' \supseteq P$ ,  $G[V(T')]$  is connected and  $\text{span}(T') > \text{span}(T)$ . By lemma 2,  $V(T') \subseteq S$  and therefore  $S \cap V(T') = V(T')$ . Since  $G[V(T')]$  is connected, it follows that  $G[S \cap V(T')]$  is also connected. Moreover,  $T'$  is also a trail in  $D[S]$

(because  $V(T') \subseteq S$ ). Hypotheses (i)-(iii) of definition 3 are thus fulfilled for  $T'$  in  $D[S]$ , meaning that  $T'$  verifies  $\mathcal{S}_P(D[S], G[S])$ , which contradicts the fact that  $T$  verifies  $\mathcal{S}_P(D[S], G[S])$ . Hence, no trail  $T'$  can exist in  $D$  that includes  $P$  such that  $G[V(T')]$  is connected and such that  $T'$  has greater span than  $T$ .  $T$  has therefore maximum span in  $D$  with respect to properties (i) and (ii).

We have proved that, if a trail  $T$  in  $D[S]$  exists such that  $T$  verifies  $\mathcal{S}_P(D[S], G[S])$ , then  $T$  is also a trail in  $D$  that verifies  $\mathcal{S}_P(D, G)$ .  $\square$

## References

- [1] Fertin G, Mohamed-Babou H, Rusu I. Algorithms for subnetwork mining in heterogeneous networks. In: International Symposium on Experimental Algorithms. Springer; 2012. p. 184–194.
