# Supplementary material for: CoMetGeNe: mining conserved neighborhood patterns in metabolic and genomic contexts
Source: Springer Nature journal article supplement (doi:10.1186/s12859-018-2542-2), 2019-01-10
Supplement: 12859_2018_2542_MOESM3_ESM.pdf [file 12859_2018_2542_MOESM3_ESM.pdf]

# CoMetGeNe: mining conserved neighborhood patterns in metabolic and genomic contexts

Alexandra Zaharia, Bernard Labedan, Christine Froidevaux, Alain Denise

## CoMetGeNe usage

### CoMetGeNe.py

Suppose CoMetGeNe is executed as follows: `CoMetGeNe.py eco data/ -dG 2 -dD 1 -o eco.out`.

Metabolic pathways for *Escherichia coli* K-12 MG1655 (eco) are automatically downloaded from KEGG and stored under `data/`. At most two genes (`-dG 2`) and one reaction (`-dD 1`) can be skipped. Results are saved in the output file `eco.out`.

Detailed CoMetGeNe.py options follow:

```
usage: CoMetGeNe.py [-h] [--delta_G NUMBER] [--delta_D NUMBER] [--timeout SECONDS]
                  [--output OUTPUT] [--skip-import]
                  ORG DIR
```

Determines maximum trails of reactions for the specified organisms such that the genes coding for the enzymes involved in the trail are neighbors.

A trail of reactions is a sequence of reactions that can repeat reactions (vertices), but not arcs between reactions.

Metabolic pathways and genomic information is automatically retrieved from the KEGG database.

#### Required arguments:

```
ORG          query organism (three- or four-letter KEGG code, e.g.
              'eco' for Escherichia coli K-12 MG1655). See full
              list of KEGG organism codes at
              http://rest.kegg.jp/list/genome
DIR          directory storing metabolic pathways for the query
              organism ORG or where metabolic pathways for ORG will
              be downloaded
```

#### Optional arguments:

```
-h, --help          show this help message and exit
--delta_G NUMBER, -dG NUMBER
                    the NUMBER of genes that can be skipped (default: 0)
--delta_D NUMBER, -dD NUMBER
                    the NUMBER of reactions that can be skipped (default:
                    0)
--timeout SECONDS, -t SECONDS
                    timeout in SECONDS (default: 300)
--output OUTPUT, -o OUTPUT
                    output file
--skip-import, -s   skips importing metabolic pathways from KEGG,
```

attempting to use locally stored KGML files if they are present under the specified directory (DIR)

Example: running

```
python2 CoMetGeNe.py eco data/ -dG 2 -o eco.out
```

downloads metabolic pathways for species 'eco' to directory 'data/'. Trail finding is performed, allowing two genes to be skipped at most (-dG 2). Reactions cannot be skipped (-dD is 0 by default). Maximum trails of reactions such that the reactions are catalyzed by products of neighboring genes are saved in the output file 'eco.out'.

## grouping.py

For example, suppose grouping is executed as follows: `grouping.py genes results/ data/ eco -o tsg.eco.csv`.

Trail grouping by genes is performed for species `eco` and the resulting table  $T_{eco}^g$  is saved in `tsg_eco.csv`. CoMetGeNe results for all species and metabolic pathways of `eco` are respectively assumed to exist in `results/` and `data/`.

Detailed grouping.py options follow:

```
usage: grouping.py [-h] [--output OUTPUT] {genes,reactions} RESULTS KGML ORG
```

Groups CoMetGeNe trails by either genes or reactions, producing a CSV file.

Required arguments:

|                                |                                                                             |
|--------------------------------|-----------------------------------------------------------------------------|
| <code>{genes,reactions}</code> | type of trail grouping to perform (possible values: 'genes' or 'reactions') |
| <code>RESULTS</code>           | directory storing CoMetGeNe results                                         |
| <code>KGML</code>              | directory containing input KGML files                                       |
| <code>ORG</code>               | reference species (KEGG organism code)                                      |

Optional arguments:

|                                         |                                 |
|-----------------------------------------|---------------------------------|
| <code>-h, --help</code>                 | show this help message and exit |
| <code>--output OUTPUT, -o OUTPUT</code> | output file (CSV)               |

KGML needs to contain a subdirectory for every species for which a result file is present in RESULTS. The subdirectory names need to be the three- or four-letter KEGG codes for the species in question (e.g., 'bsu', 'eco', 'pae', etc.). Each species subdirectory is expected to contain metabolic pathways in KGML format.

Example: running

```
python2 grouping.py genes results/ data/ eco -o grouping_gene_eco.csv
```

will perform trail grouping by genes for the reference species 'eco'. The CoMetGeNe results are stored in 'results/', and the KGML files are available in 'data/'. A CSV file is produced ('grouping\_gene\_eco.csv').
