# Supplementary material for: CoMetGeNe: mining conserved neighborhood patterns in metabolic and genomic contexts
Source: Springer Nature journal article supplement (doi:10.1186/s12859-018-2542-2), 2019-01-10
Supplement: 12859_2018_2542_MOESM10_ESM.pdf [file 12859_2018_2542_MOESM10_ESM.pdf]

eco00550\_genes

| eco_gene | str | pathway     | ype | vco | spc | paе | xfa | rso | nme | afi | ara | rrj | gsu | nde | aca | din | fnu | dap | tid | aae | bsu | lmo | sau | lac | snd | cpe | mpn | syn | pma | cau | bbv | cgl | mtv | sco | dra | tth | fgl | amo | tmm | cex | dth | fsu | gau | cph | bfr | rba | cpn | ote | bbn | emi | heo |
|----------|-----|-------------|-----|-----|-----|-----|-----|-----|-----|-----|-----|-----|-----|-----|-----|-----|-----|-----|-----|-----|-----|-----|-----|-----|-----|-----|-----|-----|-----|-----|-----|-----|-----|-----|-----|-----|-----|-----|-----|-----|-----|-----|-----|-----|-----|-----|-----|-----|-----|-----|-----|
| b0085    | +   | 00550 00300 | x   | x   | x   | x   | x   | x   | x   | x   | x   | x   | x   | x   | x   | .   | .   | x   | x   | .   | x   | x   | .   | .   | .   | x   | .   | .   | .   | .   | .   | x   | x   | x   | .   | .   | x   | x   | x   | x   | x   | x   | x   | x   | x   | .   | .   | x   | .   | .   | .   |
| b0086    | +   | 00550 00300 | x   | x   | x   | x   | x   | x   | x   | x   | x   | x   | .   | x   | x   | x   | x   | x   | x   | .   | .   | .   | .   | .   | .   | x   | .   | .   | .   | x   | x   | x   | x   | x   | x   | .   | x   | x   | x   | x   | x   | x   | x   | .   | .   | x   | x   | x   | x   | .   |     |
| b0087    | +   | 00550       | x   | x   | x   | x   | x   | x   | x   | x   | x   | x   | x   | x   | x   | x   | x   | x   | x   | .   | x   | x   | x   | x   | .   | x   | .   | .   | .   | x   | x   | x   | x   | x   | .   | x   | x   | x   | x   | x   | x   | .   | x   | x   | x   | x   | x   | x   | x   | x   |     |
| b0088    | +   | 00550 00471 | x   | x   | x   | x   | .   | x   | x   | x   | x   | .   | x   | x   | x   | x   | x   | x   | x   | .   | x   | x   | x   | x   | x   | .   | .   | .   | .   | x   | x   | x   | x   | x   | .   | x   | x   | x   | x   | x   | x   | .   | x   | x   | .   | x   | x   | .   | .   | x   |     |
| b0090    | +   | 00550       | x   | x   | x   | x   | x   | x   | x   | x   | .   | x   | x   | x   | x   | x   | x   | x   | x   | .   | x   | x   | .   | x   | .   | .   | .   | .   | x   | x   | x   | x   | x   | x   | x   | x   | x   | x   | x   | x   | x   | x   | x   | .   | x   | x   | .   | x   | .   |     |     |
| b0091    | +   | 00550 00471 | x   | x   | x   | x   | x   | x   | x   | x   | .   | x   | x   | x   | .   | x   | x   | x   | .   | .   | .   | .   | .   | .   | .   | .   | .   | .   | .   | x   | x   | x   | x   | .   | x   | x   | .   | x   | x   | x   | x   | x   | x   | x   | .   | x   | .   | .   | .   | .   |     |
