# Supplementary material for: CoMetGeNe: mining conserved neighborhood patterns in metabolic and genomic contexts
Source: Springer Nature journal article supplement (doi:10.1186/s12859-018-2542-2), 2019-01-10
Supplement: 12859_2018_2542_MOESM11_ESM.pdf [file 12859_2018_2542_MOESM11_ESM.pdf]

eco00550\_reactions

| reaction | eco_gene | pathway     | ype | vco | spc | pae | xfa | rso | nme | afi | ara | rrj | gsu | nde | aca | din | fnu | dap | tid | aae | bsu | lmo | sau | lac | snd | cpe | mpn | syn | pma | cau | bbv | cgl | mtv | sco | dra | tth | fgi | amo | tmm | cex | dth | fsu | gau | cph | bfr | rba | cpn | ote | bbn | emi | heo |
|----------|----------|-------------|-----|-----|-----|-----|-----|-----|-----|-----|-----|-----|-----|-----|-----|-----|-----|-----|-----|-----|-----|-----|-----|-----|-----|-----|-----|-----|-----|-----|-----|-----|-----|-----|-----|-----|-----|-----|-----|-----|-----|-----|-----|-----|-----|-----|-----|-----|-----|-----|-----|
| R03193   | b0091    | 00550_00471 | x   | x   | x   | x   | x   | x   | x   | x   | x   | .   | x   | x   | x   | .   | x   | x   | x   | .   | .   | .   | .   | .   | .   | .   | .   | .   | .   | x   | x   | x   | x   | .   | x   | x   | .   | x   | x   | x   | x   | x   | x   | x   | .   | x   | .   | .   | .   |     |     |
| R02783   | b0088    | 00550_00471 | x   | x   | x   | x   | .   | x   | x   | x   | x   | .   | x   | x   | x   | x   | x   | x   | x   | .   | x   | x   | x   | x   | x   | .   | .   | .   | x   | x   | x   | x   | .   | x   | x   | x   | x   | x   | x   | .   | x   | x   | x   | .   | x   | x   | .   | .   | x   |     |     |
| R02788   | b0085    | 00550_00300 | x   | x   | x   | x   | x   | x   | x   | x   | x   | x   | x   | x   | .   | .   | x   | x   | .   | x   | x   | .   | .   | .   | x   | .   | .   | .   | x   | x   | x   | x   | .   | .   | x   | x   | x   | x   | x   | x   | x   | x   | .   | .   | x   | .   | .   | .   |     |     |     |
| R04617   | b0086    | 00550_00300 | x   | x   | x   | x   | x   | x   | x   | x   | x   | x   | .   | x   | x   | x   | x   | x   | x   | .   | .   | .   | .   | .   | .   | x   | .   | .   | x   | x   | x   | x   | .   | x   | x   | x   | x   | x   | x   | x   | x   | x   | .   | .   | x   | x   | x   | x   | .   |     |     |
| R05630   | b0087    | 00550       | x   | x   | x   | x   | x   | x   | x   | x   | x   | x   | x   | x   | x   | x   | x   | x   | x   | .   | x   | x   | x   | x   | .   | x   | .   | .   | x   | x   | x   | x   | .   | x   | x   | x   | x   | x   | x   | .   | x   | x   | x   | .   | x   | x   | x   | x   |     |     |     |
| R05032   | b0090    | 00550       | x   | x   | x   | x   | x   | x   | x   | x   | .   | x   | x   | x   | x   | x   | x   | x   | .   | x   | x   | .   | x   | x   | .   | .   | .   | .   | .   | x   | x   | x   | x   | x   | x   | x   | x   | x   | x   | x   | x   | x   | x   | .   | x   | x   | .   | x   | .   |     |     |
