# Supplementary material for: CoMetGeNe: mining conserved neighborhood patterns in metabolic and genomic contexts
Source: Springer Nature journal article supplement (doi:10.1186/s12859-018-2542-2), 2019-01-10
Supplement: 12859_2018_2542_MOESM12_ESM.pdf [file 12859_2018_2542_MOESM12_ESM.pdf]

eco00260\_genes

| eco_gene | str | pathway                    | ype | vco | spc | paе | xfa | rso | nme | afi | ara | rrj | gsu | nde | aca | din | fnu | dap | tid | aae | bsu | lmo | sau | lac | snd | cpe | mpn | syn | pma | cau | bbv | cgl | mtv | sco | dra | tth | fgj | amo | tmm | cex | dth | fsu | gau | cph | bfr | rba | cpn | ote | bbn | emi | heo |   |
|----------|-----|----------------------------|-----|-----|-----|-----|-----|-----|-----|-----|-----|-----|-----|-----|-----|-----|-----|-----|-----|-----|-----|-----|-----|-----|-----|-----|-----|-----|-----|-----|-----|-----|-----|-----|-----|-----|-----|-----|-----|-----|-----|-----|-----|-----|-----|-----|-----|-----|-----|-----|-----|---|
| b0002    | +   | 00260 00261<br>00270 00300 | x   | x   | x   | x   | x   | x   | .   | x   | .   | .   | .   | x   | .   | x   | .   | x   | .   | .   | .   | x   | x   | x   | x   | .   | .   | .   | .   | .   | x   | x   | x   | x   | .   | x   | .   | x   | x   | x   | x   | .   | x   | .   | .   | x   | .   | x   | .   |     |     |   |
| b0003    | +   | 00260                      | x   | x   | x   | .   | x   | .   | .   | .   | .   | .   | .   | x   | .   | .   | .   | .   | .   | .   | .   | x   | x   | x   | .   | x   | .   | .   | .   | .   | x   | x   | x   | x   | .   | x   | x   | x   | .   | x   | .   | x   | .   | .   | .   | .   | x   | .   | x   | .   |     |   |
| b0004    | +   | 00260 00750                | x   | x   | x   | x   | x   | x   | .   | x   | .   | .   | .   | x   | x   | x   | .   | .   | .   | .   | .   | x   | x   | x   | x   | .   | .   | .   | .   | .   | .   | x   | x   | .   | x   | x   | x   | x   | x   | x   | x   | .   | x   | x   | x   | .   | .   | .   | x   | .   | x   | . |
