# Supplementary material for: CoMetGeNe: mining conserved neighborhood patterns in metabolic and genomic contexts
Source: BMC Bioinformatics. 2019 Jan 10;20:19. doi: 10.1186/s12859-018-2542-2 (PMC6327494; doi:10.1186/s12859-018-2542-2)
Supplement: Supplementary file 6 — Statistics per species for the 50 species in Table 2. The included statistics are the total number of genes, the number and percentage of enzyme-coding genes, the number of pathways, the number of trails obtained with CoMetGeNe, average and median trail span, the number of trails of span 1–3, the number of trails of span 4–10, and the number of trails of span 11 or higher. (XLS 20 kb) [file 12859_2018_2542_MOESM6_ESM.xls]

## Sheet: Sheet1
Species	Strain	Class	KEGG code	Genome size (number of genes)	Number of enzyme-coding genes	Percentage of enzyme-coding genes	Number of pathways	Number of trails	Average trail span	Median trail span	#trails of span 1-3	#trails of span 4-10	#trails of span 11+
Escherichia coli	K-12 MG1655	Gammaproteobacteria	eco	4498	1541	34.26%	89	436	4.11	3.00	274	139	23
Yersinia pestis	CO92 (biovar Orientalis)	Gammaproteobacteria	ype	4230	1412	33.38%	87	312	3.88	3.00	173	139	0
Vibrio cholerae	O395	Gammaproteobacteria	vco	3997	1309	32.75%	81	329	4.33	3.00	209	97	23
Shewanella putrefaciens	CN-32	Gammaproteobacteria	spc	4134	1135	27.46%	85	305	3.52	3.00	196	109	0
Pseudomonas aeruginosa	PAO1	Gammaproteobacteria	pae	5697	1784	31.31%	90	501	4.15	3.00	297	169	35
Xylella fastidiosa	9a5c	Gammaproteobacteria	xfa	2905	733	25.23%	69	223	5.00	3.00	116	86	21
Ralstonia solanacearum	GMI1000	Betaproteobacteria	rso	5194	1490	28.69%	93	278	3.08	3.00	206	72	0
Neisseria meningitidis	MC58 (serogroup B)	Betaproteobacteria	nme	2104	687	32.65%	73	136	4.14	2.50	93	28	15
Acidithiobacillus ferrivorans		Acidithiobacillia	afi	3336	862	25.84%	75	274	4.53	3.00	166	85	23
Agrobacterium radiobacter		Alphaproteobacteria	ara	6820	2151	31.54%	96	309	3.07	3.00	220	89	0
Rickettsia rickettsii	Iowa	Alphaproteobacteria	rrj	1495	387	25.89%	50	46	6.46	2.50	30	1	15
Geobacter sulfurreducens	PCA	Deltaproteobacteria	gsu	3711	946	25.49%	72	224	3.25	3.00	146	78	0
Nitrospira defluvii		Nitrospira	nde	4320	915	21.18%	85	317	4.19	3.00	190	104	23
Acidobacterium capsulatum		Acidobacteriales	aca	3497	886	25.34%	85	199	3.47	3.00	123	76	0
Desulfurispirillum indicum		Chrysiogenetes	din	2669	845	31.66%	70	124	2.41	2.00	115	9	0
Fusobacterium nucleatum	subsp nucleatum ATCC 25586		fnu	2062	641	31.09%	61	147	3.20	3.00	104	43	0
Denitrovibrio acetiphilus		Deferribacteres	dap	3073	877	28.54%	70	210	4.44	3.00	141	46	23
Thermodesulfatator indicus		Thermodesulfobacteria	tid	2291	765	33.39%	66	95	2.82	2.00	76	19	0
Aquifex aeolicus		Aquificae	aae	1605	655	40.81%	69	55	5.84	3.00	38	2	15
Bacillus subtilis	subsp subtilis 168	Bacilli	bsu	4420	1255	28.39%	86	420	4.00	3.00	223	178	19
Listeria monocytogenes	EGD-e	Bacilli	lmo	3055	978	32.01%	77	310	4.39	3.50	155	138	17
Staphylococcus aureus	subsp aureus N315 (MRSA/VSSA)	Bacilli	sau	2703	905	33.48%	76	341	3.82	3.00	174	167	0
Lactobacillus acidophilus	NCFM	Bacilli	lac	1927	567	29.42%	61	96	3.49	3.00	71	25	0
Streptococcus pneumoniae	ST556	Bacilli	snd	2304	709	30.77%	65	245	6.50	4.00	115	86	44
Clostridium perfringens	13	Clostridia	cpe	2848	782	27.46%	70	227	3.62	3.00	138	89	0
Mycoplasma pneumoniae	M129	Mollicutes	mpn	1061	237	22.34%	32	20	2.90	2.50	12	8	0
Synechocystis sp.	PCC 6803	Cyanobacteria (phylum)	syn	3614	957	26.48%	89	19	2.16	2.00	19	0	0
Prochlorococcus marinus	subsp marinus CCMP1375	Cyanobacteria (phylum)	pma	1930	690	35.75%	72	63	2.41	2.00	60	3	0
Chloroflexus aurantiacus		Chloroflexia	cau	3990	1034	25.91%	88	225	3.32	3.00	163	53	9
Bifidobacterium breve	ACS-071-V-Sch8b	Actinobacteria	bbv	2011	613	30.48%	70	155	5.15	3.00	97	44	14
Corynebacterium glutamicum	ATCC 13032 (Kyowa Hakko)	Actinobacteria	cgl	3057	856	28.00%	80	223	3.60	3.00	131	92	0
Mycobacterium tuberculosis	H37Rv	Actinobacteria	mtv	4091	1068	26.11%	95	261	3.21	3.00	182	79	0
Streptomyces coelicolor		Actinobacteria	sco	8299	1587	19.12%	103	313	2.98	3.00	237	76	0
Deinococcus radiodurans		Deinococci	dra	3238	832	25.69%	78	187	4.25	3.00	149	15	23
Thermus thermophilus	HB27	Thermi	tth	2263	778	34.38%	79	235	4.19	3.00	169	43	23
Fimbriimonas ginsengisoli		Fimbriimonadia	fgi	4870	925	18.99%	84	98	3.44	3.00	64	34	0
Acetomicrobium mobile		Synergistia	amo	2109	789	37.41%	69	253	5.43	3.00	154	65	34
Thermotoga maritima	MSB8	Thermotogae	tmm	1946	717	36.84%	66	239	3.95	3.00	125	114	0
Caldisericum exile		Caldisericia	cex	1634	487	29.80%	53	113	3.15	3.00	72	41	0
Dictyoglomus thermophilum		Dictyoglomia	dth	1973	674	34.16%	71	244	5.06	4.00	113	108	23
Fibrobacter succinogenes		Fibrobacteria	fsu	3188	658	20.64%	76	81	3.54	3.00	54	27	0
Gemmatimonas aurantiaca		Gemmatimonadetes	gau	3989	922	23.11%	91	243	4.53	3.00	146	74	23
Chlorobium phaeobacteroides	DSM 266	Chlorobia	cph	2799	749	26.76%	65	209	3.76	3.00	114	92	3
Bacteroides fragilis	YCH46	Bacteroidia	bfr	4717	847	17.96%	76	145	2.74	3.00	118	27	0
Rhodopirellula baltica		Planctomycetia	rba	7405	974	13.15%	82	65	2.52	2.00	59	6	0
Chlamydia pneumoniae	CWL029	Chlamydiia	cpn	1091	378	34.65%	46	87	3.34	3.00	62	25	0
Opitutus terrae		Opitutae	ote	4705	1003	21.32%	75	180	3.30	3.00	132	42	6
Borrelia burgdorferi	N40	Spirochaetia	bbn	1315	342	26.01%	37	28	3.00	2.50	20	8	0
Elusimicrobium minutum		Elusimicrobia	emi	1599	452	28.27%	65	103	3.17	3.00	75	28	0
Helicobacter pylori	26695	Epsilonproteobacteria	heo	1636	583	35.64%	66	108	5.53	3.00	68	19	21
