# Supplementary material for: CoMetGeNe: mining conserved neighborhood patterns in metabolic and genomic contexts
Source: BMC Bioinformatics. 2019 Jan 10;20:19. doi: 10.1186/s12859-018-2542-2 (PMC6327494; doi:10.1186/s12859-018-2542-2)
Supplement: Supplementary file 8 — Execution times for the 50 bacterial species in Table 2. For each of the 50 species, the total running time is indicated as well as run times for all combinations of gap parameters δG and δD ranging from 0 to 3. (XLS 27 kb) [file 12859_2018_2542_MOESM8_ESM.xls]

## Sheet: Sheet1
Species	KEGG code	Total running time	δG=0, δD=0	δG=0, δD=1	δG=0, δD=2	δG=0, δD=3	δG=1, δD=0	δG=1, δD=1	δG=1, δD=2	δG=1, δD=3	δG=2, δD=0	δG=2, δD=1	δG=2, δD=2	δG=2, δD=3	δG=3, δD=0	δG=3, δD=1	δG=3, δD=2	δG=3, δD=3
Escherichia coli	eco	1h 35min 54s	05min 21s	15min 54s	11min 01s	01min 24s	03min 46s	04min 20s	03min 46s	05min 32s	03min 45s	04min 51s	03min 40s	05min 22s	03min 47s	04min 59s	03min 54s	14min 32s
Yersinia pestis	ype	1h 18min 12s	05min 21s	15min 57s	10min 59s	01min 07s	02min 25s	03min 11s	03min 08s	07min 29s	02min 27s	03min 24s	03min 20s	07min 34s	02min 42s	03min 34s	03min 30s	02min 04s
Vibrio cholerae	vco	57min 54s	05min 16s	10min 59s	05min 44s	57s	01min 32s	02min 15s	01min 54s	03min 24s	01min 32s	02min 12s	03min 21s	08min 07s	01min 45s	02min 27s	03min 36s	02min 55s
Shewanella putrefaciens	spc	2h 05min 46s	05min 17s	11min 05s	06min 04s	20min 38s	02min 17s	02min 54s	13min 51s	10min 11s	02min 19s	03min 23s	18min 26s	05min 09s	02min 20s	03min 27s	13min 16s	05min 10s
Pseudomonas aeruginosa	pae	1h 48h 07s	10min 22s	06min 09s	06min 33s	03min 03s	05min 52s	06min 18s	06min 03s	08min 51s	05min 45s	06min 13s	06min 01s	08min 51s	05min 46s	06min 55s	06min 42s	08min 42s
Xylella fastidiosa	xfa	19min 55s	09s	25s	48s	01min 06s	45s	01min 01s	01min 29s	02min 34s	44s	01min 01s	01min 28s	02min 36s	46s	01min 04s	01min 31s	02min 28s
Ralstonia solanacearum	rso	2h 09min 04s	05min 19s	11min 06s	12min 59s	07min 54s	02min 41s	08min 28s	16min 44s	06min 15s	02min 38s	03min 23s	16min 30s	06min 08s	02min 39s	03min 28s	16min 40s	06min 10s
Neisseria meningitidis	nme	29min 15s	08s	01min 45s	05min 15s	01min 01s	37s	05min 38s	01min 03s	01min 49s	37s	39s	01min 21s	03min 26s	37s	40s	01min 24s	03min 17s
Acidithiobacillus ferrivorans	afi	1h 23min 10s	09s	25s	07min 15s	07min 26s	01min 12s	08min 05s	17min 15s	02min 58s	01min 21s	07min 52s	02min 43s	06min 36s	03min 27s	07min 54s	06min 59s	01min 36s
Agrobacterium radiobacter	ara	1h 46min 21s	01min 03s	20min 33s	05min 54s	05min 48s	05min 27s	04min 47s	05min 45s	09min 53s	05min 27s	04min 58s	05min 49s	04min 52s	05min 31s	09min 55s	05min 42s	04min 58s
Rickettsia rickettsii	rrj	03min 43s	05s	05s	04s	05s	12s	12s	13s	32s	11s	12s	12s	31s	13s	13s	13s	29s
Geobacter sulfurreducens	gsu	48min 28s	11s	45s	05min 36s	07min 57s	01min 14s	07min 20s	06min 11s	01min 15s	01min 16s	02min 23s	01min 28s	01min 33s	01min 15s	06min 54s	01min 35s	01min 35s
Nitrospira defluvii	nde	1h 16min 39s	05min 12s	06min 30s	10min 45s	01min 09s	01min 50s	08min 01s	04min 46s	08min 17s	01min 49s	03min 12s	04min 40s	03min 09s	01min 50s	07min 34s	04min 55s	02min 59s
Acidobacterium capsulatum	aca	38min 19s	10s	05min 13s	16s	19s	02min 09s	02min 16s	07min 13s	02min 18s	02min 13s	02min 17s	02min 10s	02min 15s	02min 11s	02min 18s	02min 28s	02min 33s
Desulfurispirillum indicum	din	26min 50s	05min 09s	10min 11s	11s	14s	52s	54s	56s	58s	52s	56s	56s	56s	52s	54s	58s	59s
Fusobacterium nucleatum	fnu	17min 08s	12s	05min 22s	36s	49s	30s	41s	01min 01s	01min 11s	30s	42s	58s	01min 09s	31s	43s	01min 03s	01min 11s
Denitrovibrio acetiphilus	dap	34min 46s	09s	05min 25s	05min 22s	27s	01min 02s	06min 15s	01min 16s	02min 36s	01min 04s	01min 15s	01min 14s	02min 30s	01min 03s	01min 13s	01min 16s	02min 37s
Thermodesulfatator indicus	tid	08min 20s	07s	08s	10s	13s	36s	35s	39s	42s	36s	37s	38s	42s	36s	37s	40s	42s
Aquifex aeolicus	aae	06min 57s	05s	06s	07s	07s	27s	28s	28s	47s	28s	27s	28s	47s	28s	28s	29s	48s
Bacillus subtilis	bsu	1h 30min 30s	05min 21s	06min 35s	07min 06s	07min 35s	02min 43s	04min 35s	06min 24s	06min 59s	02min 45s	04min 50s	06min 34s	07min 01s	02min 46s	04min 46s	06min 58s	07min 32s
Listeria monocytogenes	lmo	1h 12min 38s	54s	11min 28s	11min 50s	02min 19s	02min 02s	07min 24s	02min 41s	03min 16s	02min 04s	02min 19s	02min 51s	05min 50s	06min 25s	02min 26s	03min 01s	05min 49s
Staphylococcus aureus	sau	53min 47s	05min 11s	06min 19s	11min 39s	01min 53s	01min 01s	02min 09s	02min 47s	03min 05s	01min 00s	02min 06s	02min 45s	03min 06s	01min 01s	02min 11s	02min 51s	04min 44s
Lactobacillus acidophilus	lac	16min 06s	07s	24s	05min 22s	28s	28s	48s	44s	01min 17s	28s	45s	42s	01min 14s	28s	49s	44s	01min 17s
Streptococcus pneumoniae	snd	39min 17s	19s	10min 17s	53s	01min 50s	01min 02s	48s	06min 31s	01min 47s	01min 07s	52s	06min 30s	01min 43s	01min 13s	56s	01min 34s	01min 55s
Clostridium perfringens	cpe	50min 16s	12s	05min 18s	32s	03min 20s	01min 02s	02min 54s	06min 14s	05min 28s	01min 03s	02min 56s	06min 05s	04min 55s	01min 03s	03min 02s	01min 07s	05min 06s
Mycoplasma pneumoniae	mpn	07min 06s	04s	18s	14s	16s	06s	20s	50s	51s	06s	20s	48s	49s	06s	20s	50s	48s
Synechocystis sp.	syn	18min 30s	08s	09s	10s	11s	01min 30s	01min 25s	01min 31s	01min 34s	01min 31s	01min 27s	01min 26s	01min 30s	01min 29s	01min 28s	01min 31s	01min 31s
Prochlorococcus marinus	pma	08min 40s	08s	09s	10s	13s	38s	40s	39s	44s	38s	39s	40s	41s	38s	41s	42s	39s
Chloroflexus aurantiacus	cau	1h 10min 57s	05min 23s	31s	40s	08min 37s	02min 24s	02min 36s	06min 39s	06min 37s	02min 28s	02min 36s	06min 35s	06min 55s	02min 28s	02min 36s	06min 46s	07min 05s
Bifidobacterium breve	bbv	16min 52s	07s	23s	23s	31s	40s	05min 43s	46s	01min 21s	40s	44s	42s	01min 18s	41s	44s	47s	01min 23s
Corynebacterium glutamicum	cgl	32min 15s	10s	05min 27s	27s	04min 19s	01min 07s	01min 23s	01min 27s	06min 28s	01min 08s	01min 23s	01min 30s	01min 37s	01min 08s	01min 23s	01min 34s	01min 43s
Mycobacterium tuberculosis	mtv	1h 04min 27s	14s	05min 56s	05min 53s	01min 19s	03min 47s	04min 14s	03min 57s	04min 41s	04min 19s	04min 04s	03min 57s	04min 25s	04min 21s	04min 15s	04min 12s	04min 52s
Streptomyces coelicolor	sco	2h 19min 05s	18s	10min 33s	40s	05min 17s	08min 56s	18min 32s	13min 20s	08min 44s	08min 58s	08min 17s	13min 28s	08min 31s	08min 54s	08min 46s	08min 16s	07min 36s
Deinococcus radiodurans	dra	27min 15s	11s	18s	23s	35s	01min 06s	01min 23s	01min 32s	02min 59s	06min 05s	01min 24s	01min 27s	02min 51s	01min 04s	01min 24s	01min 30s	03min 02s
Thermus thermophilus	tth	22min 47s	05min 11s	16s	26s	34s	49s	52s	01min 10s	02min 31s	51s	55s	01min 09s	02min 33s	50s	58s	01min 11s	02min 31s
Fimbriimonas ginsengisoli	fgi	35min 04s	10s	01min 29s	05min 12s	16s	01min 57s	03min 09s	01min 53s	01min 59s	02min 05s	03min 16s	01min 59s	02min 02s	02min 07s	03min 22s	02min 02s	02min 07s
Acetomicrobium mobile	amo	29min 07s	09s	05min 16s	17s	05min 17s	40s	02min 04s	05min 43s	48s	41s	02min 04s	44s	50s	42s	02min 12s	48s	51s
Thermotoga maritima	tmm	38min 47s	01min 00s	12min 59s	05min 15s	20s	01min 27s	03min 28s	42s	48s	01min 24s	03min 21s	42s	50s	01min 29s	03min 26s	44s	50s
Caldisericum exile	cex	06min 27s	06s	09s	09s	09s	21s	25s	29s	43s	21s	25s	28s	42s	21s	25s	30s	43s
Dictyoglomus thermophilum	dth	17min 30s	09s	05min 12s	12s	15s	33s	38s	42s	02min 02s	33s	38s	41s	01min 58s	33s	39s	43s	02min 02s
Fibrobacter succinogenes	fsu	14min 48s	09s	05min 09s	07s	10s	48s	45s	46s	46s	48s	46s	45s	43s	49s	46s	46s	46s
Gemmatimonas aurantiaca	gau	43min 42s	05min 13s	01min 00s	05min 18s	30s	01min 33s	02min 18s	01min 40s	03min 07s	01min 33s	06min 38s	02min 12s	03min 35s	01min 34s	01min 40s	02min 18s	03min 33s
Chlorobium phaeobacteroides	cph	41min 17s	08s	44s	44s	05min 20s	53s	04min 19s	06min 02s	01min 14s	56s	04min 28s	01min 01s	01min 14s	05min 55s	05min 58s	01min 02s	01min 18s
Bacteroides fragilis	bfr	42min 15s	10s	06min 07s	05min 26s	30s	02min 07s	03min 03s	02min 25s	02min 24s	02min 09s	03min 03s	02min 20s	02min 25s	02min 11s	03min 03s	02min 24s	02min 29s
Rhodopirellula baltica	rba	1h 02min 59s	14s	05min 27s	31s	39s	03min 25s	03min 21s	03min 27s	03min 48s	10min 07s	03min 33s	03min 35s	03min 42s	10min 09s	03min 36s	03min 43s	03min 44s
Chlamydia pneumoniae	cpn	07min 38s	06s	05min 06s	06s	07s	10s	11s	11s	12s	10s	10s	10s	12s	11s	11s	12s	13s
Opitutus terrae	ote	40min 49s	12s	19s	32s	05min 49s	02min 11s	02min 19s	02min 25s	04min 35s	02min 10s	02min 12s	02min 29s	04min 23s	02min 10s	02min 18s	02min 35s	04min 09s
Borrelia burgdorferi	bbn	01min 35s	03s	04s	04s	03s	06s	06s	07s	07s	06s	06s	07s	07s	06s	07s	07s	07s
Elusimicrobium minutum	emi	05min 31s	07s	09s	10s	14s	20s	22s	24s	28s	21s	23s	25s	29s	20s	23s	24s	32s
Helicobacter pylori	heo	12min 19s	07s	05min 08s	08s	13s	22s	24s	25s	27s	24s	24s	26s	01min 16s	23s	25s	28s	01min 17s
